# Supplementary material
Source: PubMed Central journal article supplement (PMC6349383)

# Supplemental Figure 5

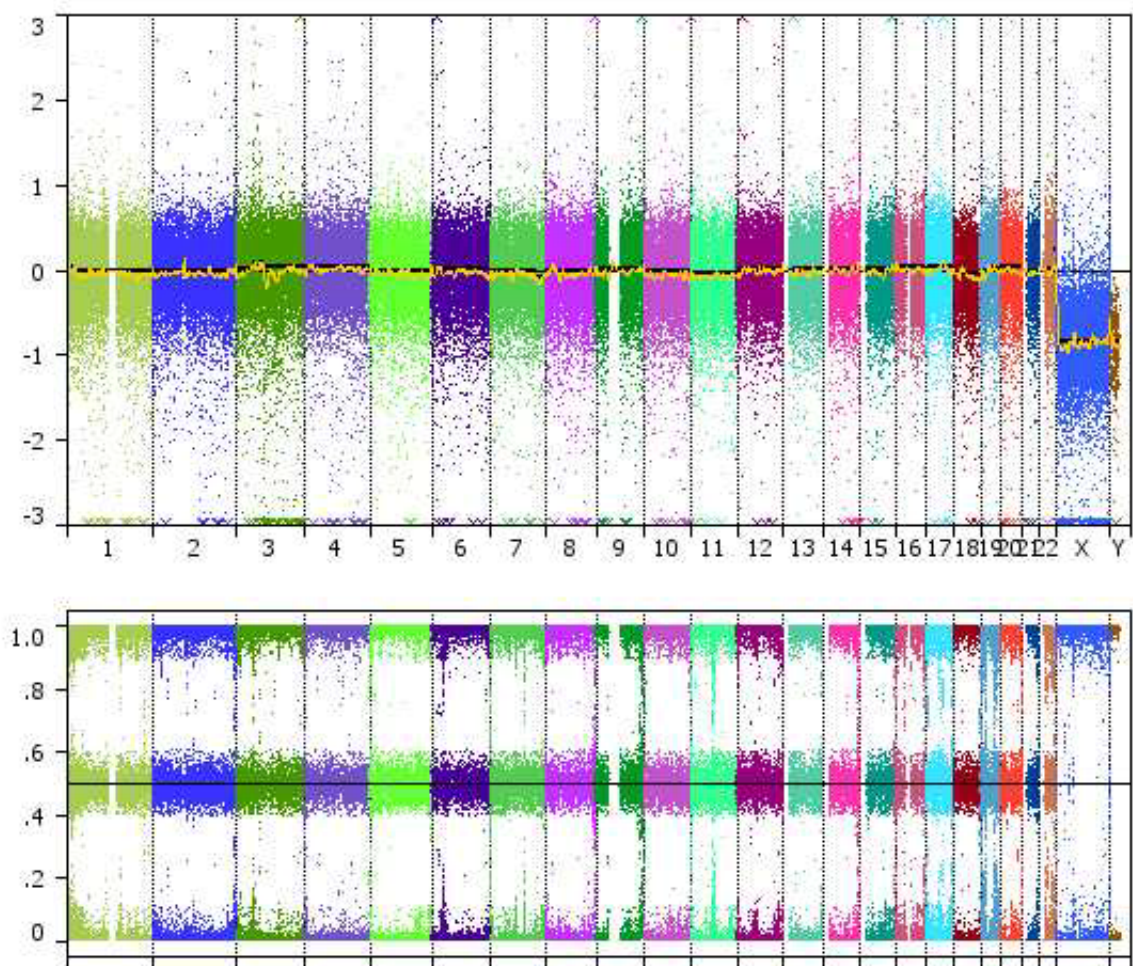

Sample: HEKa

Supplement: NIHMS1512208-supplement-5.pdf [file NIHMS1512208-supplement-5.pdf]
